# Supplementary material
Source: PubMed Central journal article supplement (PMC7714057)
Supplement: cc9-2-e0292-s002.pdf [file cc9-2-e0292-s002.pdf]

Code block diagram. The 'Main Program' continuously cycles, sampling airway pressure, illuminating an LED corresponding to the pressure, and monitoring for periods of high or low pressure. It is interrupted at by the Interrupt Service Routines (ISRs). These ISRs are triggered at specific time intervals which largely are controlled by the two user-controlled inputs to the microcontroller for respiratory rate and inspiratory time, and also by certain hardware and software triggers to generate alarms. Not shown above are blocks for clearing interrupt flags after each ISR is triggered.

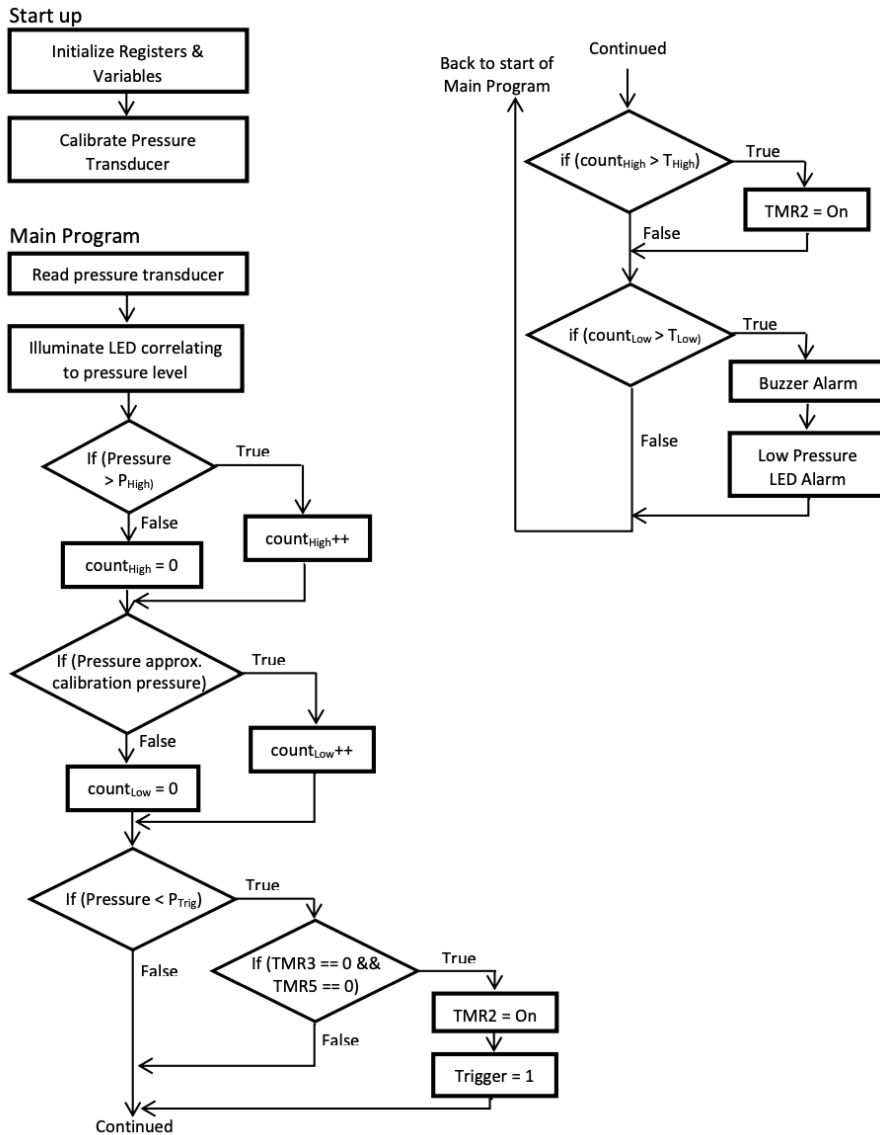

**High Priority Interrupt (TMR2)**

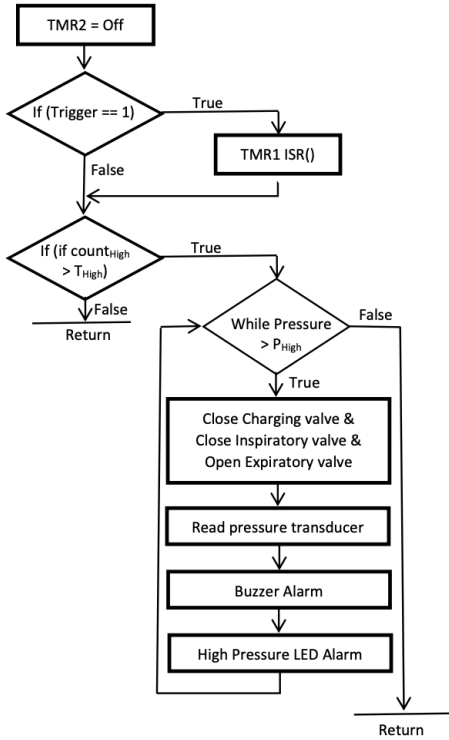

**Low Priority Interrupt #1 (TMR1)**

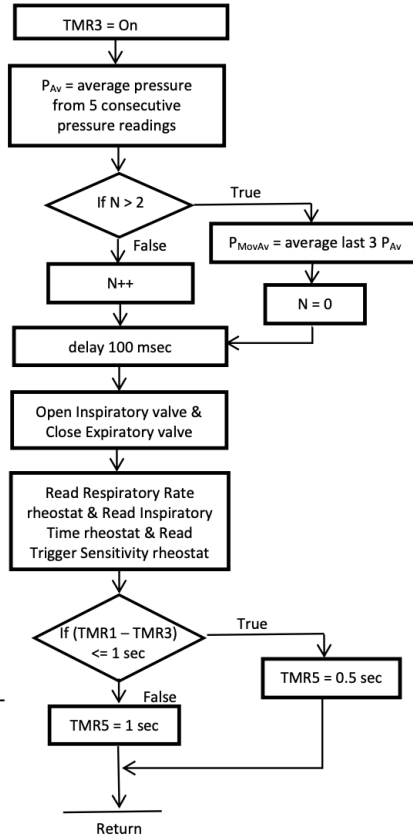

**Low Priority Interrupt #2 (TMR3)**

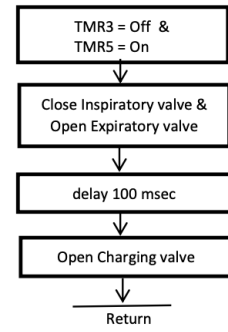

**Low Priority Interrupt #3 (TMR5)**

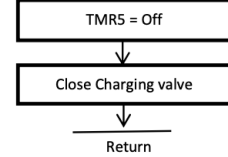

**Low Priority Interrupt #4 (Interrupt on Change pin RBO)**

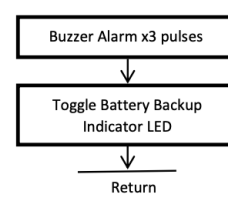

Increasing chamber size with stable lung compliance and airway resistance. Approximate increase of 45 mL for every additional chamber tab added.

### Effect of Chamber Size on Tidal Volume and Plateau Pressure

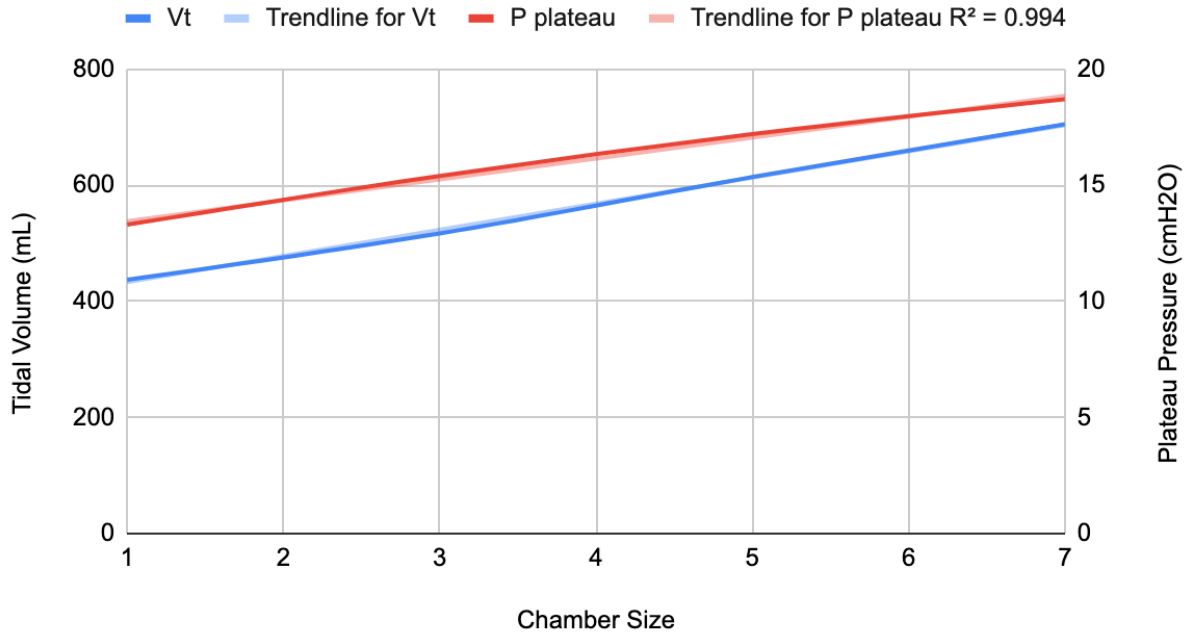

## Effects of PEEP on tidal volumes and driving pressure

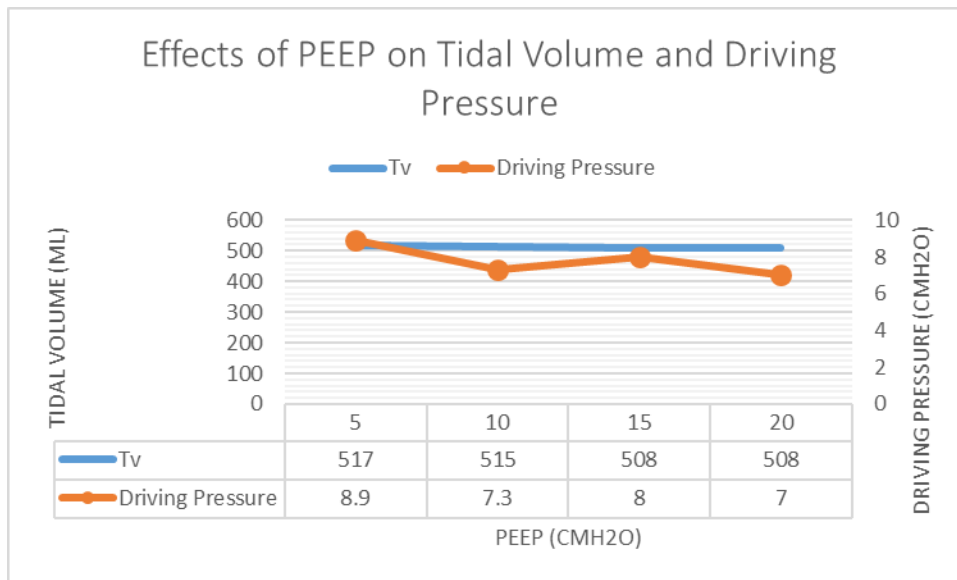

Airway pressure waveforms *in vivo*

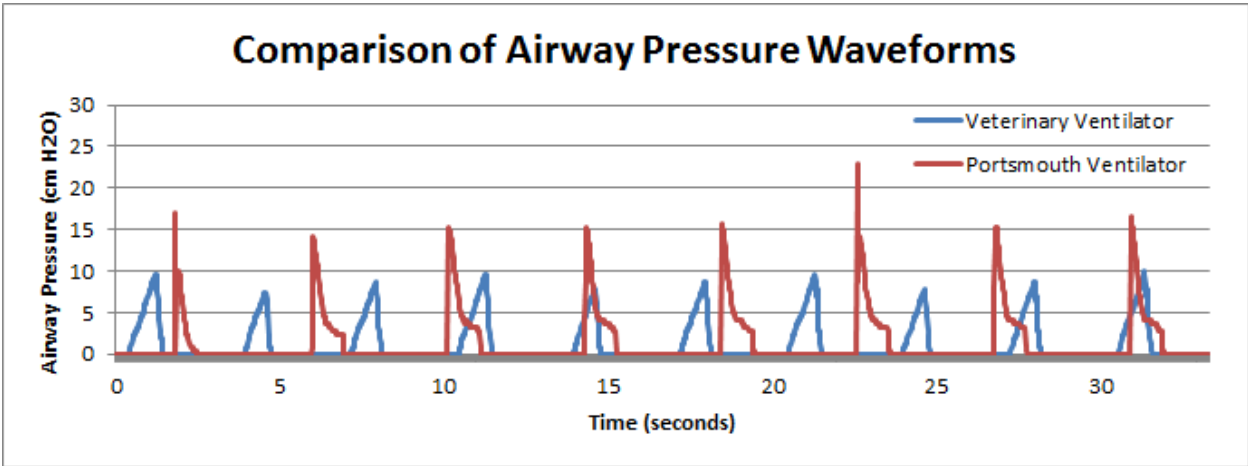

Pressure waveform measured at the y-piece of the breathing circuit using the Portsmouth ventilator. This was recorded toward the end of the study using 7 expansion chambers (tidal volume approximately 705cc, or 8.4cc/kg) and 10 cmH<sub>2</sub>O PEEP. The tracing shows the brief pressure impulse immediately following chamber depressurization. Sampling here was 60Hz, and discrete analysis shows only one data point at each of the pressures above 20 cmH<sub>2</sub>O, suggesting that the pressure exceeded 20 cmH<sub>2</sub>O for 33 milliseconds or less.

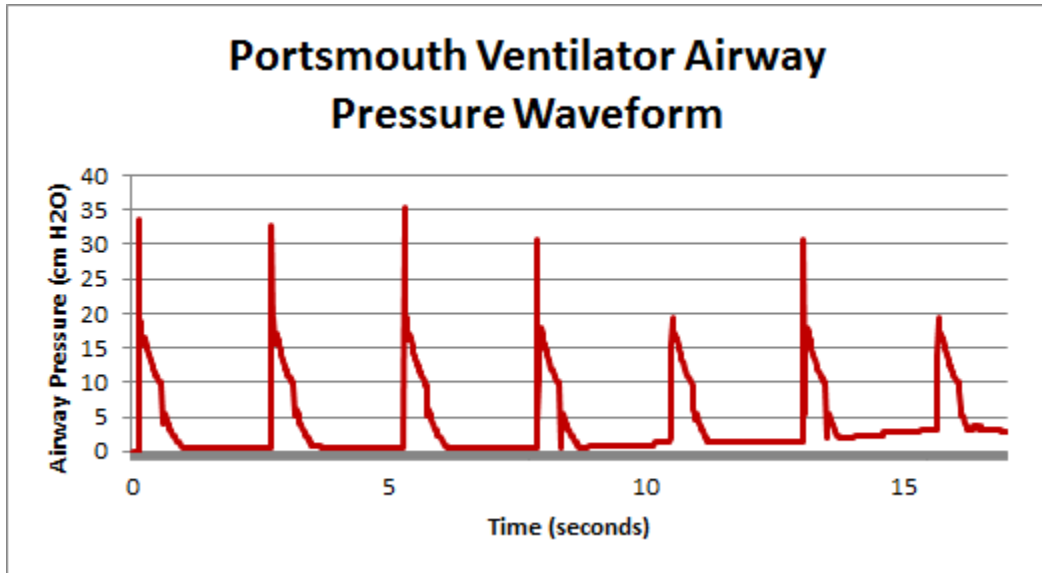

Average Tidal Volume Delivery with Varying Pulmonary Mechanics, 520 mL Tidal Volume

| <b>Resistance<br/>cmH<sub>2</sub>O/L/s</b> | <b>Compliance<br/>mL/cmH<sub>2</sub>O</b> | <b>Tidal<br/>Volume</b> | <b>% Difference<br/>from baseline</b> |
|--------------------------------------------|-------------------------------------------|-------------------------|---------------------------------------|
| 5                                          | 30                                        | 491                     | -5.58%                                |
| 5                                          | 70                                        | 522                     | 0.38%                                 |
| 5                                          | 100                                       | 531                     | 2.11%                                 |
| 5                                          | 120                                       | 535                     | 2.88%                                 |
| 10                                         | 30                                        | 487                     | -6.34%                                |
| 10                                         | 70                                        | 515                     | -0.96%                                |
| 10                                         | 120                                       | 522                     | 0.38%                                 |
| 12                                         | 50                                        | 517                     | -0.58%                                |
| 12                                         | 20                                        | 481                     | -7.50%                                |
| 15                                         | 50                                        | 514                     | -1.15%                                |
| 15                                         | 20                                        | 475                     | -8.65%                                |
| 20                                         | 20                                        | 473                     | -9.03%                                |
| 20                                         | 30                                        | 480                     | -7.69%                                |
| 20                                         | 70                                        | 498                     | -4.23%                                |
| 20                                         | 120                                       | 507                     | -2.50%                                |
| 50                                         | 100                                       | 487                     | -6.34%                                |
