# Supplementary material
Source: PubMed Central journal article supplement (PMC7714057)

DC wall supply and battery backup circuitry remain under development

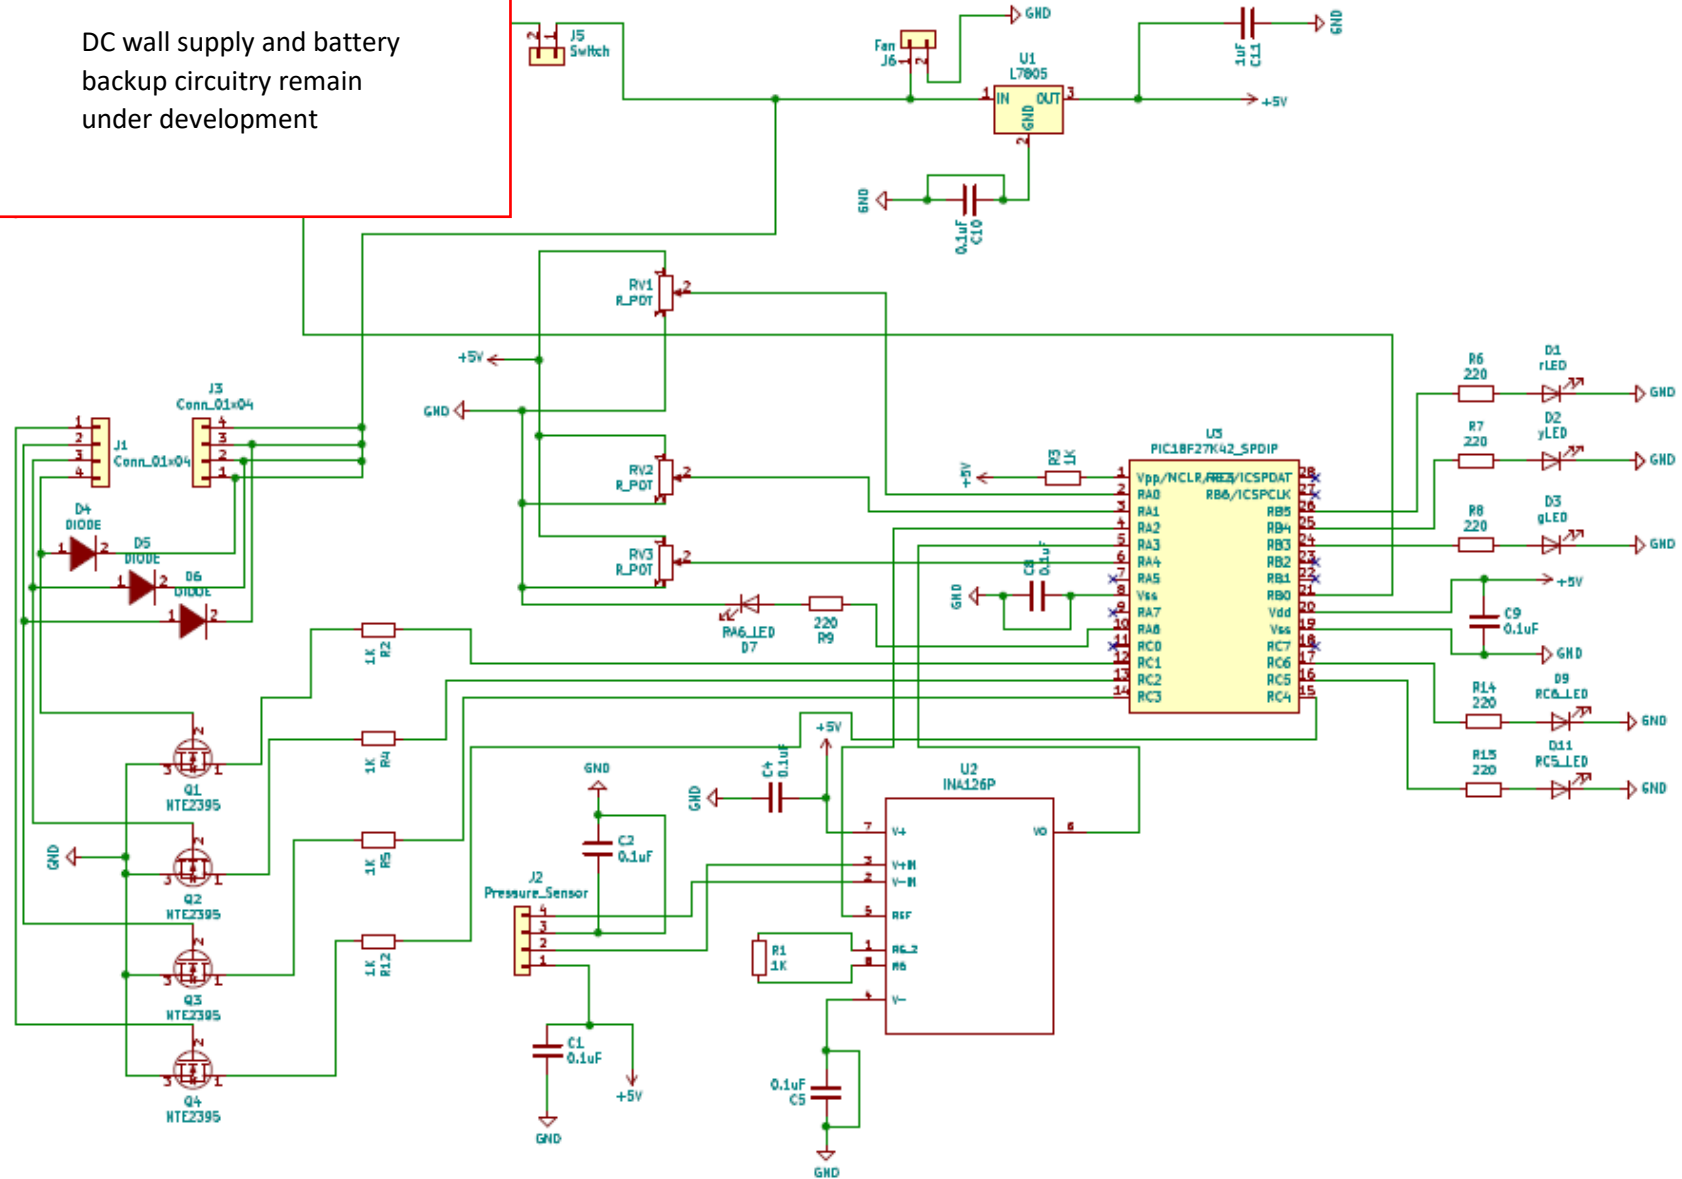

Supplement: cc9-2-e0292-s001.pdf [file cc9-2-e0292-s001.pdf]
